# Supplementary material for: Malignant Pleural Effusions Impact on Fatigue (IMPE-F): A Prospective Observational Cohort Pilot Study
Source: MDPI journal article supplement (doi:10.3390/jor1020011), 2021-03-31
Supplement: s1 [file s1]

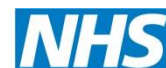

## Health Research Authority

### Yorkshire & The Humber - Leeds East Research Ethics Committee

NHSBT Newcastle Blood Donor Centre  
Holland Drive  
Newcastle upon Tyne  
NE2 4NQ

Telephone: 0207 104 8018

**Please note:** This is the favourable opinion of the REC only and does not allow you to start your study at NHS sites in England until you receive HRA Approval

31 July 2020

Dr Donna Wakefield  
Consultant in Palliative Medicine  
North Tees and Hartlepool NHS Foundation Trust  
Specialist Palliative Care Team (Farndale House)  
North Tees and Hartlepool NHS Foundation Trust  
Stockton-on-Tees  
TS19 8PE

Dear Dr Wakefield,

|                         |                                                                                                                                                           |
|-------------------------|-----------------------------------------------------------------------------------------------------------------------------------------------------------|
| <b>Study title:</b>     | <b>Do Interventions for Malignant Pleural Effusions (MPE) impact on patient reported Fatigue levels? A questionnaire-based pilot study (IMPE-F study)</b> |
| <b>REC reference:</b>   | <b>20/YH/0224</b>                                                                                                                                         |
| <b>Protocol number:</b> | <b>version 2</b>                                                                                                                                          |
| <b>IRAS project ID:</b> | <b>276451</b>                                                                                                                                             |

Thank you for your email of 30<sup>th</sup> July 2020, responding to the Proportionate Review Sub-Committee's request for changes to the documentation for the above study.

The revised documentation has been reviewed and approved on behalf of the PR sub-committee.

#### Confirmation of ethical opinion

On behalf of the Committee, I am pleased to confirm a **favourable ethical opinion** for the above research on the basis described in the application form, protocol and supporting documentation as revised.

#### Conditions of the favourable opinion

The REC favourable opinion is subject to the following conditions being met prior to the start of the study.

Confirmation of Capacity and Capability (in England, Northern Ireland and Wales) or NHS management permission (in Scotland) should be sought from all NHS organisations involved in the study in accordance with NHS research governance arrangements. Each NHS organisation must confirm through the signing of agreements and/or other documents that it has given permission for the research to proceed (except where explicitly specified otherwise).

Guidance on applying for HRA and HCRW Approval (England and Wales)/ NHS permission for research is available in the Integrated Research Application System.

For non-NHS sites, site management permission should be obtained in accordance with the procedures of the relevant host organisation.

Sponsors are not required to notify the Committee of management permissions from host organisations.

### Registration of Clinical Trials

It is a condition of the REC favourable opinion that **all clinical trials are registered** on a publicly accessible database. For this purpose, 'clinical trials' are defined as the first four project categories in IRAS project filter question 2. Registration is a legal requirement for [clinical trials of investigational medicinal products \(CTIMPs\)](#), except for phase I trials in healthy volunteers (these must still register as a condition of the REC favourable opinion).

Registration should take place as early as possible and within six weeks of recruiting the first research participant at the latest. Failure to register is a breach of these approval conditions, unless a deferral has been agreed by or on behalf of the Research Ethics Committee (see here for more information on requesting a deferral:

<https://www.hra.nhs.uk/planning-and-improving-research/research-planning/research-registration-research-project-identifiers/>

As set out in the UK Policy Framework, research sponsors are responsible for making information about research publicly available before it starts e.g. by registering the research project on a publicly accessible register. Further guidance on registration is available at: <https://www.hra.nhs.uk/planning-and-improving-research/research-planning/transparency-responsibilities/>

You should notify the REC of the registration details. We routinely audit applications for compliance with these conditions.

### Publication of Your Research Summary

We will publish your research summary for the above study on the research summaries section of our website, together with your contact details, no earlier than three months from the date of this favourable opinion letter. Should you wish to provide a substitute contact point, make a request to defer, or require further information, please visit:

<https://www.hra.nhs.uk/planning-and-improving-research/application-summaries/research-summaries/>

For research studies related to COVID-19, we are fast-tracking the publication of research summaries. During this public health emergency, it is vital that everyone can promptly identify all relevant research related to COVID-19 that is taking place globally. If you have not already done so, please register your study on a public registry as soon as possible and provide the HRA with the registration detail, which will be posted alongside other information relating to your project. We are also asking sponsors not to request deferral of publication of research summary for any projects relating to COVID-19. In addition, to facilitate finding and extracting studies related to COVID-19 from public databases, please enter the WHO official acronym for the coronavirus disease (COVID-19) in the full title of your study. Approved COVID-19 studies can be found at: <https://www.hra.nhs.uk/covid-19-research/approved-covid-19-research/>

**It is the responsibility of the sponsor to ensure that all the conditions are complied with before the start of the study or its initiation at a particular site (as applicable).**

### **After ethical review: Reporting requirements**

The attached document “After ethical review – guidance for researchers” gives detailed guidance on reporting requirements for studies with a favourable opinion, including:

- Notifying substantial amendments
- Adding new sites and investigators
- Notification of serious breaches of the protocol
- Progress and safety reports
- Notifying the end of the study, including early termination of the study
- Final report

The latest guidance on these topics can be found at <https://www.hra.nhs.uk/approvals-amendments/managing-your-approval/>.

### **Ethical review of research sites**

The favourable opinion applies to all NHS/HSC sites taking part in the study, subject to management permission being obtained from the NHS/HSC R&D office prior to the start of the study (see “Conditions of the favourable opinion” above).

### **Approved documents**

The documents reviewed and approved by the Committee are:

| <i>Document</i>                                     | <i>Version</i> | <i>Date</i>     |
|-----------------------------------------------------|----------------|-----------------|
| IRAS Application Form [IRAS_Form_08072020]          |                | 08 July 2020    |
| IRAS Application Form XML file [IRAS_Form_08072020] |                | 08 July 2020    |
| IRAS Checklist XML [Checklist_08072020]             |                | 08 July 2020    |
| IRAS Checklist XML [Checklist_27072020]             |                | 27 July 2020    |
| IRAS Checklist XML [Checklist_30072020]             |                | 30 July 2020    |
| Letter from funder [Funding letter]                 | 1              | 13 May 2020     |
| Letter from sponsor [R&D Sponsor confirmation]      | 1              | 17 January 2020 |
| Other [PIS&consentV6MarkedVersion]                  | 6              | 30 July 2020    |

|                                                                      |           |                  |
|----------------------------------------------------------------------|-----------|------------------|
| Other [Consent V6- Marked version]                                   | 6         | 30 July 2020     |
| Participant consent form [PIS & consent]                             | 6         | 26 July 2020     |
| Participant information sheet (PIS) [PIS & Consent]                  | 6         | 26 July 2020     |
| Research protocol or project proposal [Protocol]                     | 2         | 02 July 2020     |
| Summary CV for Chief Investigator (CI) [CI CV]                       | 1         | 01 July 2020     |
| Summary CV for student [CV]                                          | 1         | 01 July 2020     |
| Summary CV for supervisor (student research) [CV Project supervisor] | 1         | 07 July 2020     |
| Validated questionnaire [Validated questionnaire]                    | version 4 | 16 November 2007 |

### Statement of compliance

The Committee is constituted in accordance with the Governance Arrangements for Research Ethics Committees and complies fully with the Standard Operating Procedures for Research Ethics Committees in the UK.

### User Feedback

The Health Research Authority is continually striving to provide a high quality service to all applicants and sponsors. You are invited to give your view of the service you have received and the application procedure. If you wish to make your views known please use the feedback form available on the HRA website:

<http://www.hra.nhs.uk/about-the-hra/governance/quality-assurance/>

### HRA Learning

We are pleased to welcome researchers and research staff to our HRA Learning Events and online learning opportunities– see details at:

<https://www.hra.nhs.uk/planning-and-improving-research/learning/>

**IRAS project ID: 276451  
correspondence**

**Please quote this number on all**

With the Committee's best wishes for the success of this project.

Yours sincerely  
pp



**Dr Nana Theodorou  
Chair**

Email: leedseast.rec@hra.nhs.uk
