# Supplementary material for: Malignant Pleural Effusions Impact on Fatigue (IMPE-F): A Prospective Observational Cohort Pilot Study
Source: MDPI journal article supplement (doi:10.3390/jor1020011), 2021-03-31
Supplement: s1 [file s1]

Dr Donna Wakefield  
Consultant in Palliative Medicine  
North Tees and Hartlepool NHS Foundation Trust  
Specialist Palliative Care Team (Farndale House)  
North Tees and Hartlepool NHS Foundation Trust  
Stockton-on-Tees  
TS19 8PE

Email: [approvals@hra.nhs.uk](mailto:approvals@hra.nhs.uk)  
[HCRW.approvals@wales.nhs.uk](mailto:HCRW.approvals@wales.nhs.uk)

03 August 2020

Dear Dr Wakefield

**HRA and Health and Care  
Research Wales (HCRW)  
Approval Letter**

|                         |                                                                                                                                                           |
|-------------------------|-----------------------------------------------------------------------------------------------------------------------------------------------------------|
| <b>Study title:</b>     | <b>Do Interventions for Malignant Pleural Effusions (MPE) impact on patient reported Fatigue levels? A questionnaire based pilot study (IMPE-F study)</b> |
| <b>IRAS project ID:</b> | <b>276451</b>                                                                                                                                             |
| <b>Protocol number:</b> | <b>version 2</b>                                                                                                                                          |
| <b>REC reference:</b>   | <b>20/YH/0224</b>                                                                                                                                         |
| <b>Sponsor</b>          | <b>Northumbria Healthcare NHS Foundation Trust</b>                                                                                                        |

I am pleased to confirm that [HRA and Health and Care Research Wales \(HCRW\) Approval](#) has been given for the above referenced study, on the basis described in the application form, protocol, supporting documentation and any clarifications received. You should not expect to receive anything further relating to this application.

Please now work with participating NHS organisations to confirm capacity and capability, in line with the instructions provided in the “Information to support study set up” section towards the end of this letter.

**How should I work with participating NHS/HSC organisations in Northern Ireland and Scotland?**

HRA and HCRW Approval does not apply to NHS/HSC organisations within Northern Ireland and Scotland.

If you indicated in your IRAS form that you do have participating organisations in either of these devolved administrations, the final document set and the study wide governance report

(including this letter) have been sent to the coordinating centre of each participating nation. The relevant national coordinating function/s will contact you as appropriate.

Please see [IRAS Help](#) for information on working with NHS/HSC organisations in Northern Ireland and Scotland.

### **How should I work with participating non-NHS organisations?**

HRA and HCRW Approval does not apply to non-NHS organisations. You should work with your non-NHS organisations to [obtain local agreement](#) in accordance with their procedures.

### **What are my notification responsibilities during the study?**

The standard conditions document “[After Ethical Review – guidance for sponsors and investigators](#)”, issued with your REC favourable opinion, gives detailed guidance on reporting expectations for studies, including:

- Registration of research
- Notifying amendments
- Notifying the end of the study

The [HRA website](#) also provides guidance on these topics, and is updated in the light of changes in reporting expectations or procedures.

### **Who should I contact for further information?**

Please do not hesitate to contact me for assistance with this application. My contact details are below.

Your IRAS project ID is **276451**. Please quote this on all correspondence.

Yours sincerely,  
Christie Ord

Approvals Specialist

Email: [approvals@hra.nhs.uk](mailto:approvals@hra.nhs.uk)

Copy to: *Peta Heslop, Northumbria NHS Healthcare Foundation Trust*

## List of Documents

The final document set assessed and approved by HRA and HCRW Approval is listed below.

| <i>Document</i>                                                      | <i>Version</i> | <i>Date</i>      |
|----------------------------------------------------------------------|----------------|------------------|
| IRAS Application Form [IRAS_Form_08072020]                           |                | 08 July 2020     |
| Letter from funder [Funding letter]                                  | 1              | 13 May 2020      |
| Letter from sponsor [R&D Sponsor confirmation]                       | 1              | 17 January 2020  |
| Other [PIS&consentV6MarkedVersion]                                   | 6              | 30 July 2020     |
| Other [Consent V6- Marked version]                                   | 6              | 30 July 2020     |
| Participant consent form [PIS & consent]                             | 6              | 26 July 2020     |
| Participant information sheet (PIS) [PIS & Consent]                  | 6              | 26 July 2020     |
| Research protocol or project proposal [Protocol]                     | 2              | 02 July 2020     |
| Summary CV for Chief Investigator (CI) [CI CV]                       | 1              | 01 July 2020     |
| Summary CV for student [CV]                                          | 1              | 01 July 2020     |
| Summary CV for supervisor (student research) [CV Project supervisor] | 1              | 07 July 2020     |
| Validated questionnaire [Validated questionnaire]                    | version 4      | 16 November 2007 |

## Information to support study set up

The below provides all parties with information to support the arranging and confirming of capacity and capability with participating NHS organisations in England and Wales. This is intended to be an accurate reflection of the study at the time of issue of this letter.

| Types of participating NHS organisation                                           | Expectations related to confirmation of capacity and capability                                                                                                                                                                                                                   | Agreement to be used                                                                           | Funding arrangements                    | Oversight expectations        | HR Good Practice Resource Pack expectations                                                                                                                                        |
|-----------------------------------------------------------------------------------|-----------------------------------------------------------------------------------------------------------------------------------------------------------------------------------------------------------------------------------------------------------------------------------|------------------------------------------------------------------------------------------------|-----------------------------------------|-------------------------------|------------------------------------------------------------------------------------------------------------------------------------------------------------------------------------|
| Participating NHS organisations will conduct all study activities as per protocol | This is a single site study sponsored by the participating NHS organisation. You should work with your sponsor R&D office to make arrangements to set up the study. The sponsor R&D office will confirm to you when the study can start following issue of HRA and HCRW Approval. | As site is also sponsor, it is anticipated that existing contractual arrangements are in place | External study funding has been secured | The CI will act as PI at site | It is anticipated that all study activities at site will be conducted by local staff with an existing contractual relationship. No further HR Good Practice arrangements expected. |

## Other information to aid study set-up and delivery

*This details any other information that may be helpful to sponsors and participating NHS organisations in England and Wales in study set-up.*

The applicant has indicated that they intend to apply for inclusion on the NIHR CRN Portfolio.
